# Supplementary material for: Carbon dioxide droplets stabilized by g-C3N4
Source: Royal Society of Chemistry journal article supplement (doi:10.1039/c8gc01666f), 2018-01-01
Supplement: c8gc01666f1.pdf [file c8gc01666f1.pdf]

Supporting information for:

**Carbon Dioxide Droplets Stabilized by g-C<sub>3</sub>N<sub>4</sub>**

Lifei Liu, Jianling Zhang,\* Bingxing Zhang, Jinbiao Shi, Xiuniang Tan, Buxing Han,  
Tian Luo, Dan Shao, Dongxing Tan, Fanyu Zhang

Beijing National Laboratory for Molecular Sciences, CAS Key Laboratory of Colloid, Interface and  
Thermodynamics, Institute of Chemistry, Chinese Academy of Sciences.

University of Chinese Academy of Sciences.

\*E-mail: zhangjl@iccas.ac.cn

## Experimental Procedures

**Materials.** Triethanolamine (TEOA) was provided by Acros Organics, USA. CO<sub>2</sub> was supplied by Beijing Analytical Instrument Factory with purity of >99.99%. Dimethyl formamide (DMF), potassium chloride (KCl) and dimethylsulfoxide (DMSO) were purchased from Beijing Chemical Works. Urea and formic acid were supplied by Sinopharm Chemical Reagent Co., Ltd.

**g-C<sub>3</sub>N<sub>4</sub> preparation.** g-C<sub>3</sub>N<sub>4</sub> was prepared by thermal treatment of urea according to literature.<sup>1</sup> In a typical process, 5.0 g of urea was put in a porcelain boat with a cover. It was calcined in a muffle furnace and heated to 600 °C for 2 h in air with a heating rate of 2.5 °C min<sup>-1</sup>. After cooled down to 300 °C with a rate of 10 °C min<sup>-1</sup>, the final product was collected after naturally cooled down to the room temperature.

**Characterization.** X-ray diffraction (XRD) was performed using a Rigaku D/max-2500 diffractometer with Cu K $\alpha$  radiation ( $\lambda = 1.5418 \text{ \AA}$ ) at 40 kV and 200 mA. The morphology of catalyst was characterized by SEM (HITACHI S-4800) and HRTEM (JEM-2100F). Electrical conductivity meter was produced by Shanghai Precision Scientific Instrument Co., Ltd. (Model DDS-307). The porosity properties were obtained from N<sub>2</sub> adsorption-desorption isotherms using a NOVA 2200e system. The optical absorption was characterized by ultraviolet visible diffuse reflectance spectrum (UV-vis DRS, UV-2600, SHIMADZU).

**Emulsion preparation.** The sample cell is composed of a cubic stainless steel cell with two pairs of rounded quartz windows, which are 3.0 cm in diameter and 0.7 cm in thickness. The net volume of the cell is 6.0 mL, without the volume of magnetic stirring. In a typical experiment, the desired amount of aqueous dispersion of g-C<sub>3</sub>N<sub>4</sub> was added into the sample cell. CO<sub>2</sub> was subsequently charged. As the desired pressure was reached under thermal equilibrium (25.0 °C) with the aid of a water bath, the emulsion was formed under vigorous stirring. The phase behavior of the CO<sub>2</sub>/H<sub>2</sub>O/g-C<sub>3</sub>N<sub>4</sub> mixture was observed and photographed.

**High-pressure conductivity measurement.** The apparatus consists mainly of a cylindrical stainless steel vessel with a Teflon inner cell, a pair of electrode welded in the vessel, and an electrical conductivity meter connected outside (with a precision of  $\pm 0.5\%$ ). The electrodes are made of Pt foil. The conductivity meter was calibrated with KCl standard aqueous solutions (0.01 M) before measurement. The net volume of the sample cell is 24.0 mL without the volume of magnetic stirring and electrodes. In a typical experiment, the desired amount of aqueous dispersion of g-C<sub>3</sub>N<sub>4</sub> was added into the vessel, CO<sub>2</sub> was charged subsequently under vigorous stirring. The conductivities were recorded at desired pressure. The conductivities were self-calibrated into the standard value at 25.0 °C.

**Photocatalytic reaction.** The photocatalytic reaction was carried out in a self-designed cylindrical autoclaves. There is a circular quartz window (1.2 cm in diameter and 0.6 cm in thickness) on the top of the autoclave. The net volume of the sample cell is 4.0 mL. The Xe lamp (300 W) was provided by Zhongjiaojinyuan Co., Ltd. In a typical experiment for the photocatalytic reaction in the g-C<sub>3</sub>N<sub>4</sub>-stabilized CO<sub>2</sub>/water emulsion at different pressure, 6 mg of g-C<sub>3</sub>N<sub>4</sub> was pre-dispersed in TEOA/water solution (1mL/2mL), where TEOA acted as sacrificial electron donor during the photocatalytic reduction process of CO<sub>2</sub>. Subsequently, CO<sub>2</sub> was charged under vigorous stirring. As the desired pressure was reached under thermal equilibrium (25.0 °C) with the aid of a water bath, artificial sunlight was supplied by a 300 W Xe lamp to start the photoreaction. After reaction for 2 h, CO<sub>2</sub> was removed by depressurization. The left mixture was centrifuged into solid and liquid phase. The product in the liquid phase was identified by <sup>1</sup>H NMR spectroscopy (BrukerAvance III 400 HD). The product yield was calculated from the integration of <sup>1</sup>H NMR peaks using dimethylsulfoxide as the internal standard.

## Results and Discussion

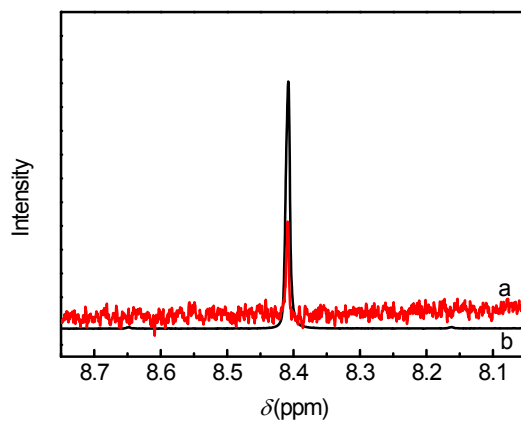

**Figure S1.** <sup>1</sup>H NMR spectrum of the liquid phase for the photocatalytic reaction in CO<sub>2</sub>-in-water emulsion stabilized by g-C<sub>3</sub>N<sub>4</sub> at 8.02 MPa. <sup>1</sup>H NMR spectrum for original solution (a) and the same sample with added formic acid (b).

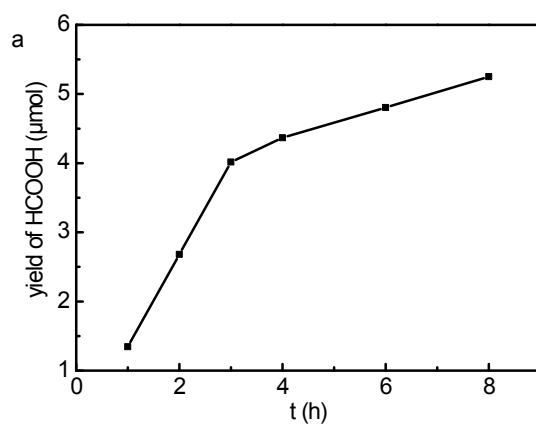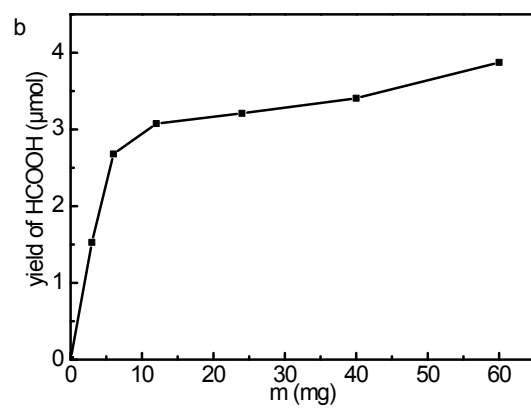

**Figure S2.** Yields of formic acid produced by the photocatalytic reaction in  $\text{CO}_2$ -in-water emulsions with different reaction time (a) and different mass of  $\text{g-C}_3\text{N}_4$  (b). The pressure was fixed at 8.02 MPa.

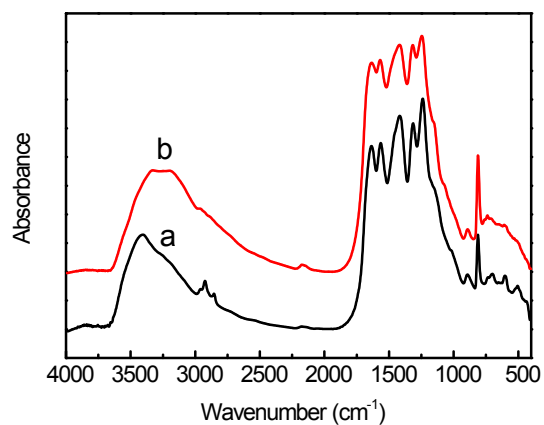

**Figure S3.** Infrared spectra of the pristine  $g\text{-C}_3\text{N}_4$  (a), and that after used for the photocatalysis (b). The broad band between 3500-3000  $\text{cm}^{-1}$  can be attributed to the strong N-H and N-H<sub>2</sub> stretches, which indicates the uncondensed amino functional groups. Peaks at 1636  $\text{cm}^{-1}$ , 1564  $\text{cm}^{-1}$ , and 1418  $\text{cm}^{-1}$  are attributed to the stretching vibrations of heptazine-derived repeating units. Peaks at 1314  $\text{cm}^{-1}$  and 1240  $\text{cm}^{-1}$  are derived from the typical out-of-plane bending vibrations of heptazine rings. The absorption band at 893  $\text{cm}^{-1}$  is attributed to the deformation mode of N-H, which results from the incomplete condensation of amino groups. The peak at 812  $\text{cm}^{-1}$  is the characteristic breathing mode of heptazine.<sup>2</sup>

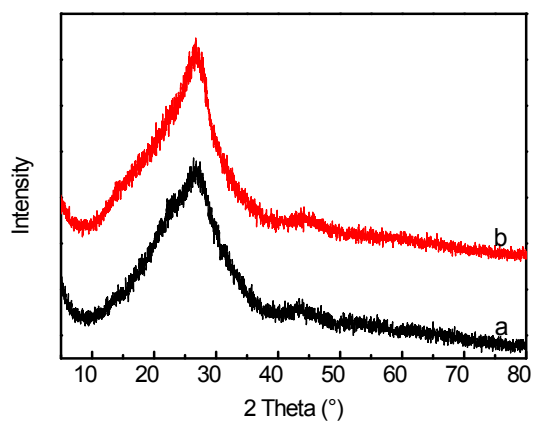

**Figure S4.** XRD patterns of the pristine g-C<sub>3</sub>N<sub>4</sub> (a) and that after used for the photocatalysis (b).

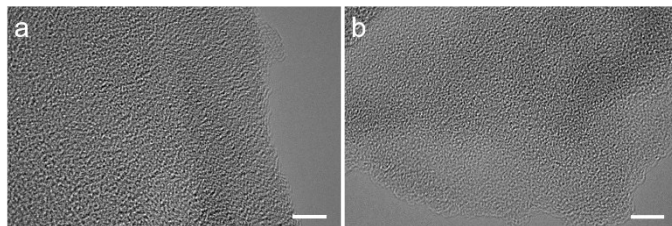

**Figure S5.** HRTEM images of the pristine g-C<sub>3</sub>N<sub>4</sub> (a) and that after used for photocatalysis (b). Scale bars: 5 nm. No obvious difference was observed, indicating the structure stability of g-C<sub>3</sub>N<sub>4</sub>.

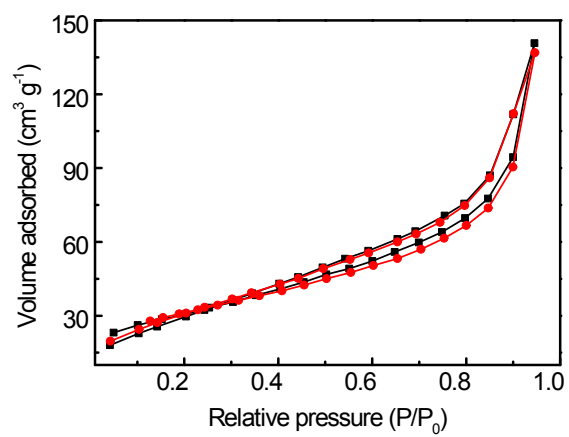

**Figure S6.** N<sub>2</sub> adsorption-desorption isotherms of the pristine g-C<sub>3</sub>N<sub>4</sub> (black) and that after used for the photocatalysis (red). The BET surface areas of the g-C<sub>3</sub>N<sub>4</sub> were determined to be 57.0 m<sup>2</sup> g<sup>-1</sup> and 54.6 m<sup>2</sup> g<sup>-1</sup>, respectively.



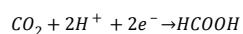

**Equation S1.** Chemical reaction for the photocatalytic CO<sub>2</sub> reduction to formic acid.

**Table S1.** Production of formic acid and the corresponding reaction conditions catalysed by Ru-complex/g-C<sub>3</sub>N<sub>4</sub> hybrid systems in literature.

| Entry | Photocatalyst                          | Amount of formic acid formed (μmol) | TOF/μmol·g <sup>-1</sup> ·h <sup>-1</sup> |
|-------|----------------------------------------|-------------------------------------|-------------------------------------------|
| 1     | RuP/C <sub>3</sub> N <sub>4</sub>      | 5.8                                 | 290                                       |
| 2     | RuP/Ag/C <sub>3</sub> N <sub>4</sub>   | 19.2                                | 960                                       |
| 3     | RuRu'/C <sub>3</sub> N <sub>4</sub>    | 0.6                                 | 30                                        |
| 4     | RuRu'/Ag/C <sub>3</sub> N <sub>4</sub> | 42.3                                | 2115                                      |
| 5     | Ag/C <sub>3</sub> N <sub>4</sub>       | 1.2                                 | 60                                        |
| 6     | RuRu'/Cu/C <sub>3</sub> N <sub>4</sub> | 0.3                                 | 15                                        |
| 7     | Cu/C <sub>3</sub> N <sub>4</sub>       | 0                                   |                                           |
| 8     | RuRu'/Au/C <sub>3</sub> N <sub>4</sub> | 1.7                                 | 85                                        |
| 9     | Au/C <sub>3</sub> N <sub>4</sub>       | 0.5                                 | 25                                        |
| 10    | RuP/C <sub>3</sub> N <sub>4</sub>      | 8.8                                 | 1100                                      |
| 11    | RuP/C <sub>3</sub> N <sub>4</sub>      | 68                                  | 425                                       |
| 12    | RuP/C <sub>3</sub> N <sub>4</sub>      | 1.854                               | 46.35                                     |

Reaction conditions: entry 1-9, photocatalyst, 4.0 mg (Ru complex loading, 3.4 μmol g<sup>-1</sup>; metal loading, 5.0 wt %); solution, 4.0 mL of 4:1 (v/v) N,N-dimethylacetamide (DMA)/TEOA; reaction time, 5 h; λ > 400 nm.<sup>3</sup> Entry 10, photocatalyst, 8.0 mg RuP (7.8 μmol g<sup>-1</sup>)/C<sub>3</sub>N<sub>4</sub>; solution, 4.0 mL of 4:1 (v/v) DMA/TEOA; reaction time, 1 h, λ > 400 nm.<sup>4</sup> Entry 11, photocatalyst, 8.0 mg RuP (7.8 μmol g<sup>-1</sup>)/C<sub>3</sub>N<sub>4</sub>; solution, 4.0 mL of 4:1 (v/v) DMA/TEOA, reaction time, 20 h, λ > 400 nm.<sup>5</sup> Entry 12, photocatalyst, 8.0 mg RuP (3.9 mmol g<sup>-1</sup>)/C<sub>3</sub>N<sub>4</sub>; solution, 4.0 mL of 4:1 (v/v) acetonitrile/TEOA; reaction time, 5 h, λ > 400 nm.<sup>6</sup> RuRu' is a Ru(II) binuclear complex, RuP is a mononuclear Ru(II) complex Ru{4,4'-(PO<sub>3</sub>H<sub>2</sub>)<sub>2</sub>-2,2'-bipyridine}(CO)<sub>2</sub>Cl<sub>2</sub>. TOF values were calculated with respect to the amount of photocatalyst.

## References

- 1 G Zhang, Z-A Lan, L Lin, S Lin and X Wang, *Chem. Sci.*, 2016, **7**, 3062.
- 2 (a) B. Zhu, P. Xia, W. Ho and J. Yu, *Appl. Surf. Sci.*, 2015, **344**, 188; (b) D. O. Adekoya, M. Tahir and N. A. S. Amin, *J. CO<sub>2</sub> Util.*, 2017, **18**, 261.
- 3 R. Kuriki, H. Matsunaga, T. Nakashima, K. Wada, A. Yamakata, O. Ishitani and K. Maeda, *J. Am. Chem. Soc.*, 2016, **138**, 5159.
- 4 R. Kuriki, K. Sekizawa, O. Ishitani and K. Maeda, *Angew. Chem. Int. Ed.*, 2015, **54**, 2406.
- 5 K. Maeda, R. Kuriki, M. Zhang, X. Wang and O. Ishitania, *J. Mater. Chem. A*, 2014, **2**, 15146.
- 6 R. Kuriki, O. Ishitani and K. Maeda, *ACS Appl. Mater. Interfaces*, 2016, **8**, 6011.
